# Supplementary material for: Cholinergic neuromodulation of inhibitory interneurons facilitates functional integration in whole-brain models
Source: PubMed Central journal article supplement (PMC7924765; doi:10.1371/journal.pcbi.1008737), 2021-02-18
Supplement: pcbi.1008737.s001.pdf [file pcbi.1008737.s001.pdf]

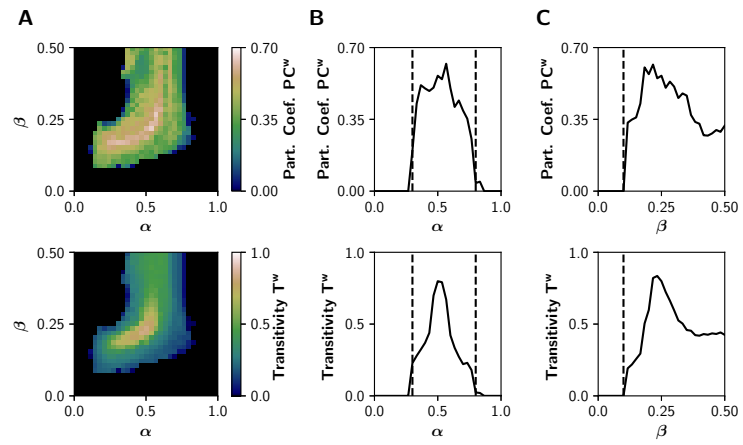

**S1 Fig. Alternative measures of network segregation and integration in the  $(\alpha, \beta)$  parameter space.**

**A)** Mean participation coefficient  $PC^w$  (integration) and transitivity  $T^w$  (segregation). **B-C)** Transitions in the direction of  $\alpha$  and  $\beta$  axes. Dashed lines represent critical transitions.
