# Supplementary material for: Cholinergic neuromodulation of inhibitory interneurons facilitates functional integration in whole-brain models
Source: PubMed Central journal article supplement (PMC7924765; doi:10.1371/journal.pcbi.1008737), 2021-02-18
Supplement: pcbi.1008737.s002.pdf [file pcbi.1008737.s002.pdf]

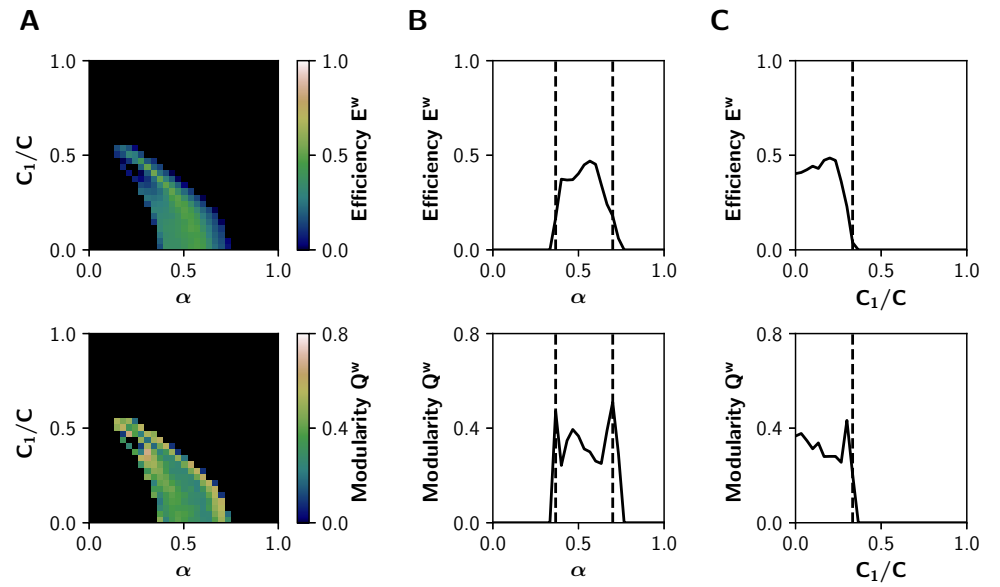

**S2 Fig. Network features in the  $(\alpha, C_1)$  parameter space.**

**A)** Global efficiency  $E^w$  (integration) and modularity  $Q^w$  (segregation) of the graphs derived from the sFCs of the BOLD-like signals. **B)** Transitions in the direction of  $\alpha$  axis, for a fixed  $C_1 = 0$ . **C)** Transitions in the direction of  $C_1$  axis, for a fixed  $\alpha = 0.5$ . Dashed lines represent critical transitions.
