# Supplementary material for: Cholinergic neuromodulation of inhibitory interneurons facilitates functional integration in whole-brain models
Source: PubMed Central journal article supplement (PMC7924765; doi:10.1371/journal.pcbi.1008737), 2021-02-18
Supplement: pcbi.1008737.s003.pdf [file pcbi.1008737.s003.pdf]

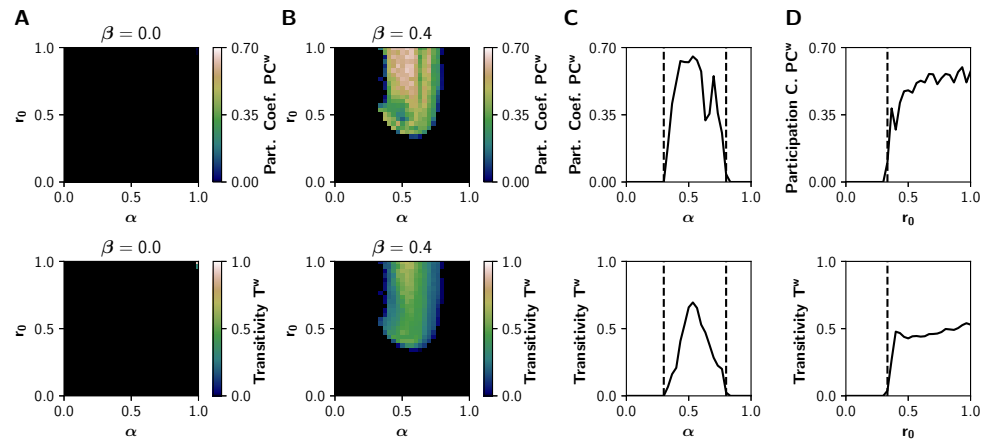

**S3 Fig. Alternative measures of network segregation and integration in the  $(\alpha, r_0)$  parameter space for  $\beta = 0.4$ .**

**A-B)** Mean participation coefficient  $PC^w$  (integration) and transitivity  $T^w$  (segregation) with **A)**  $\beta = 0$  and **B)**  $\beta = 0.4$ . **C-D)** Transitions in the direction of  $\alpha$  and  $r_0$  axes. Dashed lines represent critical transitions.
