# Supplementary material for: Cholinergic neuromodulation of inhibitory interneurons facilitates functional integration in whole-brain models
Source: PubMed Central journal article supplement (PMC7924765; doi:10.1371/journal.pcbi.1008737), 2021-02-18
Supplement: pcbi.1008737.s004.pdf [file pcbi.1008737.s004.pdf]

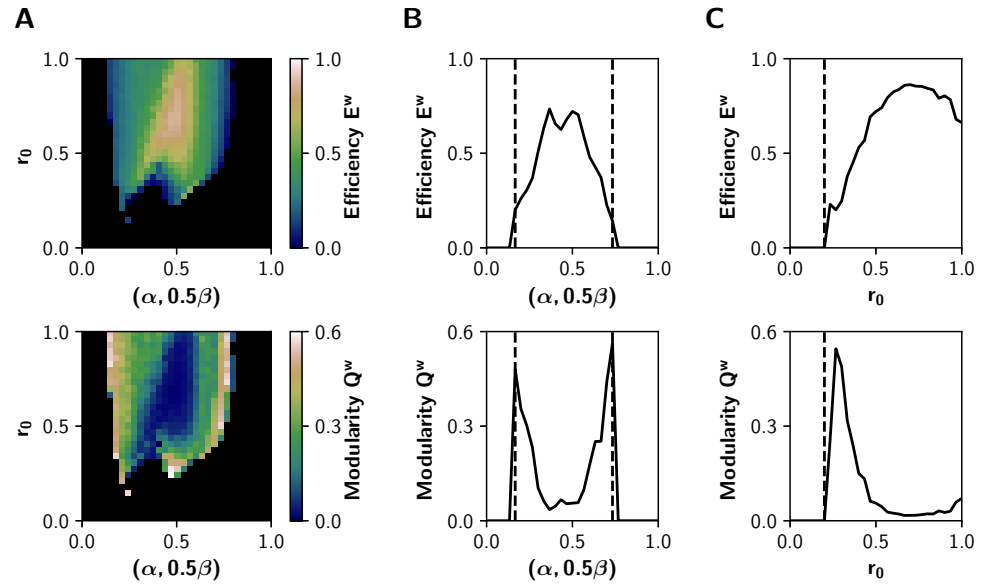

**S4 Fig. Simultaneous effect of  $\alpha$ ,  $\beta$  and  $r_0$  in network features.**

**A)** Global efficiency  $E^w$  (integration) and modularity  $Q^w$  (segregation) of the graphs derived from the sFCs of the BOLD-like signals. **B)** Transitions in the direction of  $\alpha$  axis, for a fixed  $r_0 = 0.5 \text{ mV}^{-1}$ . **C)** Transitions in the direction of  $r_0$  axis, for a fixed  $\alpha = 0.5$ . Dashed lines represent critical transitions. Both coupling parameters change in parallel following the relationship  $\beta = 0.5\alpha$ .
