# Supplementary material for: Cholinergic neuromodulation of inhibitory interneurons facilitates functional integration in whole-brain models
Source: PubMed Central journal article supplement (PMC7924765; doi:10.1371/journal.pcbi.1008737), 2021-02-18
Supplement: pcbi.1008737.s005.pdf [file pcbi.1008737.s005.pdf]

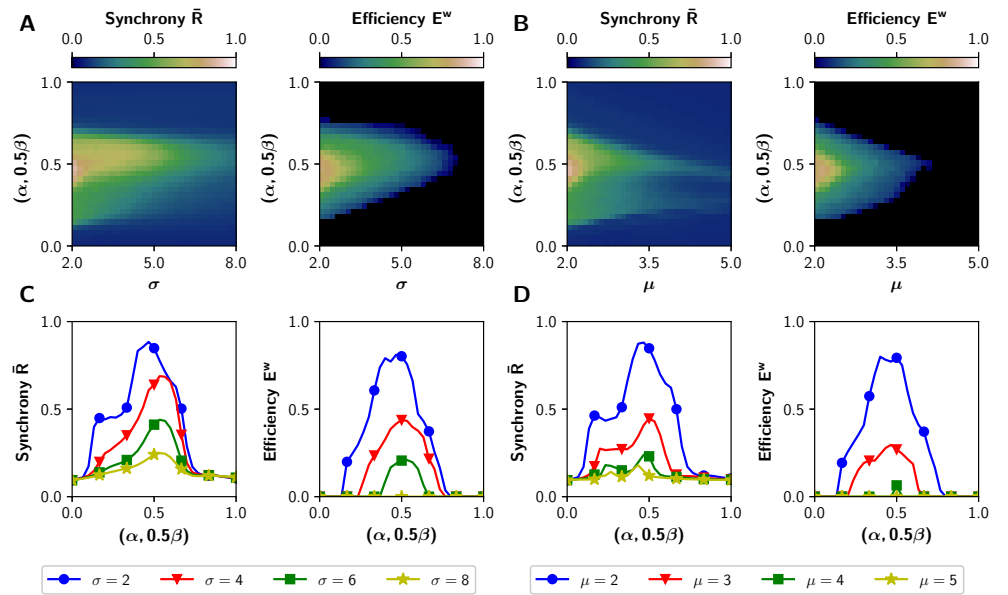

**S5 Fig. Effect of the input standard deviation,  $\sigma$ , and mean,  $\mu$ , in synchronization and integration.**

**A-B)** Average phase synchrony  $\bar{R}$  measured over the EEG-like signals, and global efficiency  $E^w$  computed over the sFC matrices build using the BOLD-like signals.  $\sigma$  and  $\mu$  reduces the increment of  $\bar{R}$  and  $E^w$  mediated by  $\alpha$  and  $\beta$ . Both coupling parameters change in parallel following the relationship  $\beta = 0.5\alpha$ . **C-D)** Phase synchrony  $\bar{R}$  and global efficiency  $E^w$  as a function of  $\alpha$  and  $\beta$ , for different  $\sigma$  (left hand) and  $\mu$  (right hand) values.
