# Supplementary material for: Cholinergic neuromodulation of inhibitory interneurons facilitates functional integration in whole-brain models
Source: PubMed Central journal article supplement (PMC7924765; doi:10.1371/journal.pcbi.1008737), 2021-02-18
Supplement: pcbi.1008737.s006.pdf [file pcbi.1008737.s006.pdf]

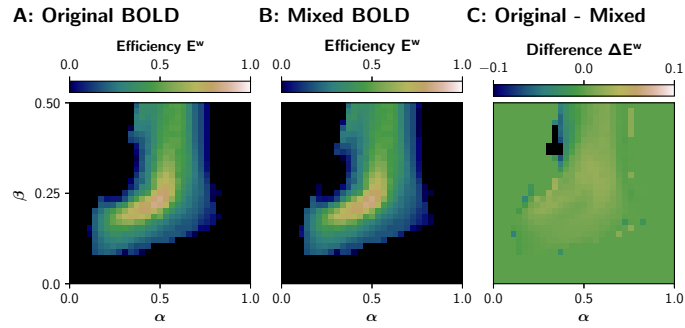

**S6 Fig. Network integration computed from mixed BOLD-like signals.**  
**A)** Global efficiency  $E^w$  computed in the entire  $(\alpha, \beta)$  parameter space. BOLD-like signals were computed using only the firing rates of pyramidal neurons. **B)**  $E^w$  calculated starting from a summation of the BOLD-like signals simulated using the firing rates of the three neural masses: pyramidal neurons, excitatory and inhibitory interneurons. **C)** Difference in the global efficiency  $\Delta E^w$  between the two matrices in the  $(\alpha, \beta)$  parameter space. Green values correspond to near-zero difference between the matrices. There is not a noticeable difference between them.
